# Supplementary material
Source: HighWire-hosted journal article supplement (https://qdcxjkg.com/highwire/filestream/114274/field_highwire_adjunct_files/0/Supplementary_figures.pdf)

## Supplementary data

**SUPPLEMENTARY FIGURE 1.** Least squares mean change from baseline in serial forced vital capacity (mL) over time at (a) day 1 and (b) day 84 (intent-to-treat population). CI: confidence interval; LSM: least squares mean; UMEC: umeclidinium bromide.

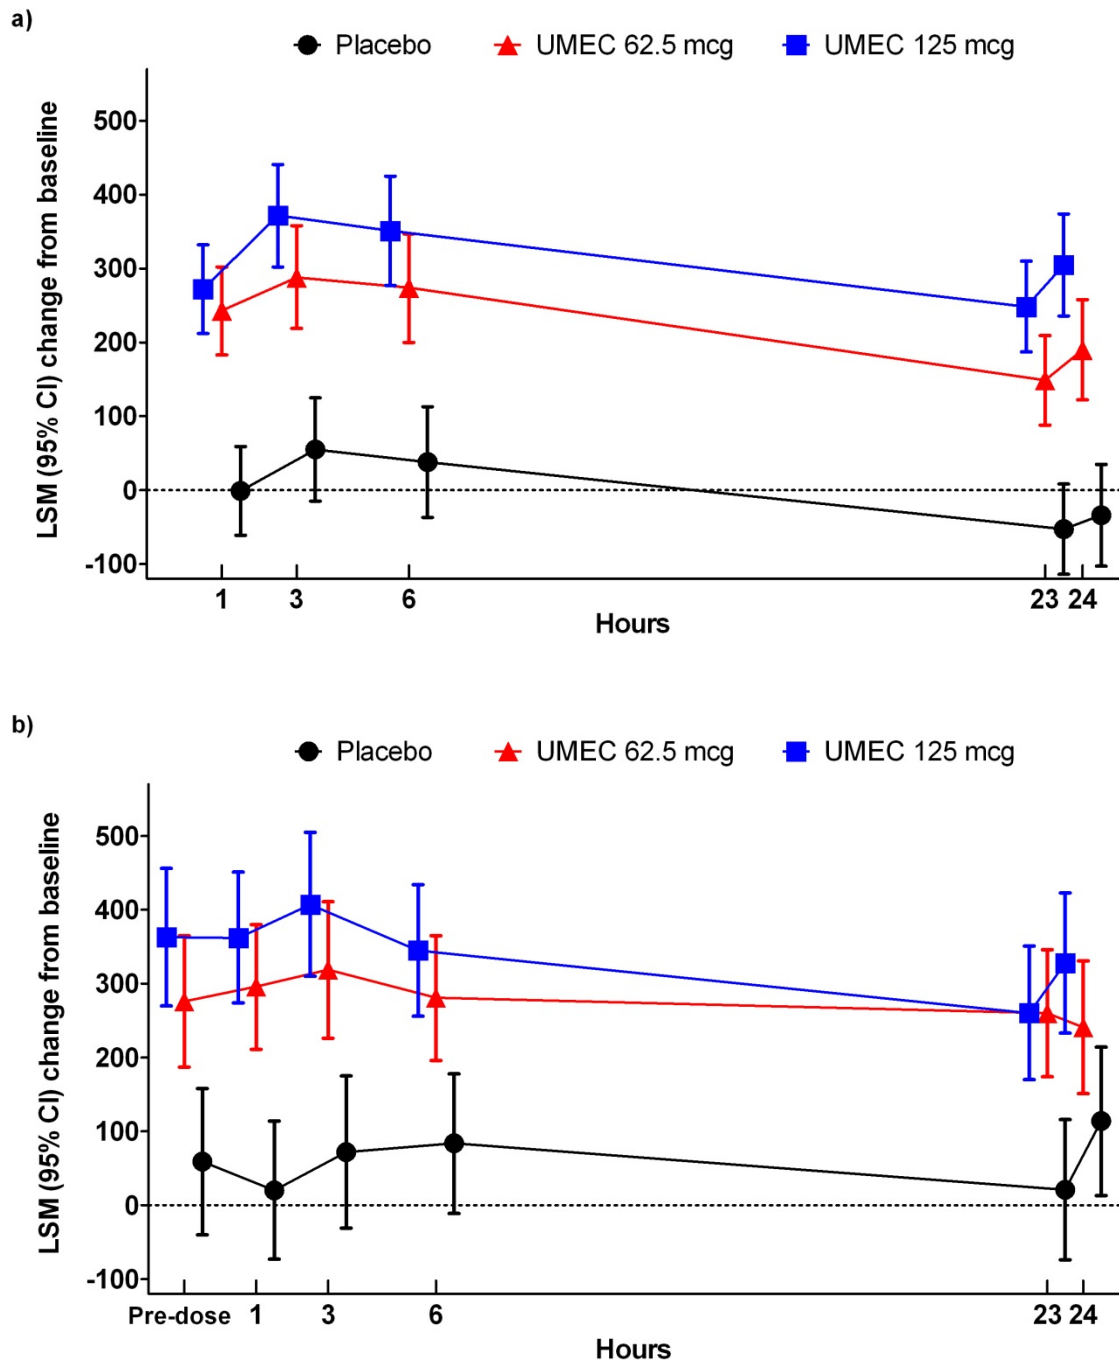

Supplement: Supplementary_figures.pdf [file Supplementary_figures.pdf]
